# Supplementary material for: Raven’s Standard Progressive Matrices for Adolescents: A Case for a Shortened Version
Source: MDPI journal article supplement (doi:10.3390/jintelligence11040072), 2023-04-13
Supplement: s1 [file s1]

## Supplementary Online Materials (SOM)

### Results preregistered linear mixed models

For our linear mixed models, the assumption of linearity was met for the models fit on fatigue, motivation and performance (see Figure S2 for plotted residuals). Although violating the assumptions of homoscedasticity and normality is not problematic for robust estimation in linear mixed models (Schielzeth et al., 2020), we did evaluate these two assumptions. The assumption of homoscedasticity was assessed with Levene's tests, and was met for the models fit on fatigue,  $F(1, 198) = 0.73$ ,  $p = .39$ , and motivation,  $F(1, 198) = 0.02$ ,  $p = .90$ , but not performance,  $F(1, 198) = 14.57$ ,  $p < .001$  (variance was higher for the original than for the short version, see SOM Figure S2).

The assumption of normality was tested with Kolmogorov-Smirnoff tests, and was met for the model fit on fatigue for the short ( $D = 0.12$ ,  $p = .14$ ) but not original version ( $D = 0.16$ ,  $p = .01$ ), was met for the model fit on motivation for both the short ( $D = 0.12$ ,  $p = .21$ ) and original ( $D = 0.08$ ,  $p = .56$ ) version, and was not met for the model fit on performance for the short ( $D = 0.21$ ,  $p < .001$ ) nor the original version ( $D = 0.43$ ,  $p < .001$ ).

### Figure S1

*Plotted residuals (left column) and Q-Q normal plots (right column) for the models fit on fatigue, motivation and performance.*

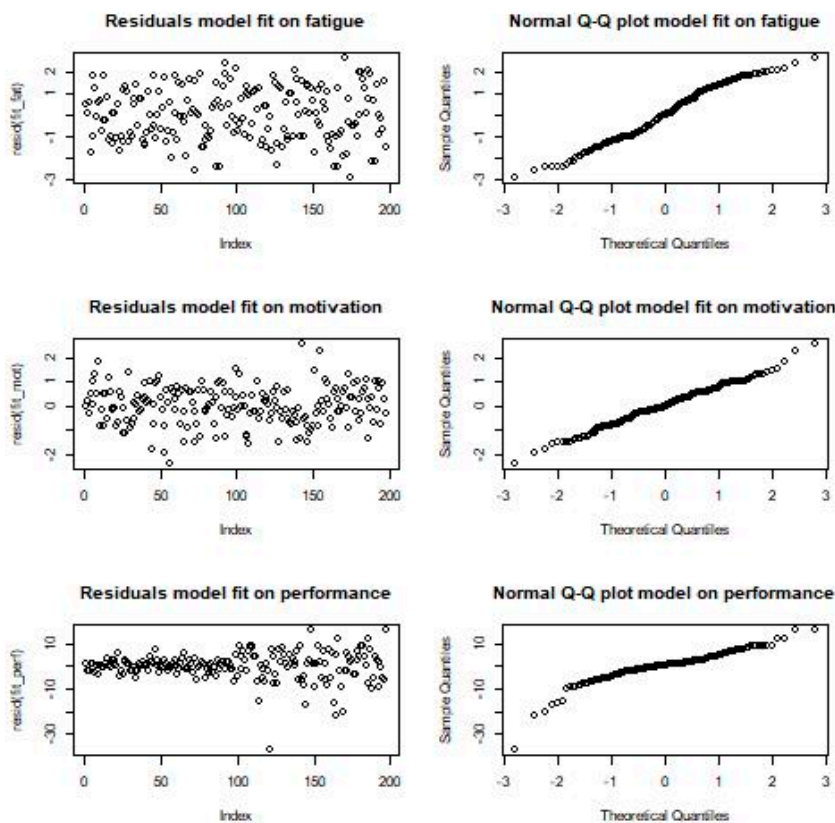

*Note:* With the plots in the left hand column we check whether residual variance is similar across versions. There were 99 participants, the first 99 indices represent participant IDs in the short version, while the second 99 indices represent participant IDs in the original version. The y-axes represent residual variance.

**Table S1**

*Results from linear mixed models on effects of task order and task version on fatigue, motivation, and performance (manipulation checks).*

| <i>Fatigue</i>                                       |             |           |               |          |                 |
|------------------------------------------------------|-------------|-----------|---------------|----------|-----------------|
| Predictors                                           | <i>b</i>    | <i>SE</i> | 95% CI        | <i>t</i> | <i>p</i>        |
| Intercept                                            | 3.95        | 0.15      | 3.65 – 4.24   | 26.16    | <b>&lt;.001</b> |
| task order                                           | -0.17       | 0.15      | -0.47 – 0.13  | -1.14    | .257            |
| task version                                         | 0.58        | 0.10      | 0.37 – 0.78   | 5.53     | <b>&lt;.001</b> |
| task order * task version                            | -0.31       | 0.10      | -0.51 - -0.10 | -2.92    | <b>.004</b>     |
| Random effects                                       |             |           |               |          |                 |
| $\sigma^2$                                           | 2.10        | 1.45      |               |          |                 |
| Random intercept                                     | 1.13        | 1.06      |               |          |                 |
| ICC                                                  | 0.35        |           |               |          |                 |
| Marginal R <sup>2</sup> / conditional R <sup>2</sup> | 0.11 / 0.42 |           |               |          |                 |
| <i>Motivation</i>                                    |             |           |               |          |                 |
| Predictors                                           | <i>b</i>    | <i>SE</i> | 95% CI        | <i>t</i> | <i>p</i>        |
| Intercept                                            | 3.54        | 0.15      | 3.24 – 3.84   | 23.27    | <b>&lt;.001</b> |
| task order                                           | 0.06        | 0.15      | -0.24 – 0.36  | 0.42     | .677            |
| task version                                         | -0.23       | 0.07      | -0.37 - -0.08 | -3.07    | <b>.003</b>     |
| task order * task version                            | 0.06        | 0.07      | -0.09 – 0.20  | 0.81     | .420            |
| Random effects                                       |             |           |               |          |                 |
| $\sigma^2$                                           | 1.05        | 1.02      |               |          |                 |
| Random intercept                                     | 1.69        | 1.30      |               |          |                 |
| ICC                                                  | 0.62        |           |               |          |                 |
| Marginal R <sup>2</sup> / conditional R <sup>2</sup> | 0.02 / 0.62 |           |               |          |                 |
| <i>Performance</i>                                   |             |           |               |          |                 |
| Predictors                                           | <i>b</i>    | <i>SE</i> | 95% CI        | <i>t</i> | <i>p</i>        |
| Intercept                                            | 69.91       | 0.74      | 68.45 – 71.37 | 94.35    | <b>&lt;.001</b> |
| task order                                           | -0.05       | 0.74      | -1.51 – 1.41  | -0.07    | .95             |
| task version                                         | -2.10       | 0.51      | -3.11 – 1.09  | -4.11    | <b>&lt;.001</b> |
| task order * task version                            | 0.51        | 0.51      | -0.50 – 1.51  | 0.99     | .326            |
| Random effects                                       |             |           |               |          |                 |
| $\sigma^2$                                           | 50.18       | 7.08      |               |          |                 |
| Random intercept                                     | 27.24       | 5.22      |               |          |                 |
| ICC                                                  | 0.35        |           |               |          |                 |
| Marginal R <sup>2</sup> / conditional R <sup>2</sup> | 0.05 / 0.39 |           |               |          |                 |

*Note:* Marginal R<sup>2</sup> denotes variance explained by fixed factors while conditional R<sup>2</sup> denotes variance explained by both fixed and random factors.

**Table S2***Results from linear mixed models on fatigue, motivation and performance (main analyses).*

| <i>Fatigue</i>                                       |             |           |               |          |                 |
|------------------------------------------------------|-------------|-----------|---------------|----------|-----------------|
| Predictors                                           | <i>b</i>    | <i>SE</i> | 95% CI        | <i>t</i> | <i>p</i>        |
| Intercept                                            | 3.94        | 0.15      | 3.64 – 4.23   | 26.04    | <b>&lt;.001</b> |
| task order                                           | -0.13       | 0.15      | -0.43 – 0.17  | -0.84    | .405            |
| task version                                         | 0.57        | 0.10      | 0.36 – 0.77   | 5.42     | <b>&lt;.001</b> |
| age                                                  | 0.25        | 0.15      | -0.05 – 0.55  | 1.65     | .103            |
| sex                                                  | -0.11       | 0.14      | -0.38 – 0.16  | -0.79    | .432            |
| task order * task version                            | -0.27       | 0.11      | -0.48 - -0.06 | -2.56    | <b>.012</b>     |
| age * task version                                   | 0.15        | 0.11      | -0.06 – 0.36  | 1.37     | .174            |
| sex * task version                                   | -0.01       | 0.10      | -0.20 – 0.18  | -0.10    | .921            |
| age * sex                                            | 0.02        | 0.15      | -0.27 – 0.31  | 0.15     | .882            |
| age * sex * task version                             | -0.08       | 0.10      | -0.27 – 0.12  | -0.74    | .462            |
| Random effects                                       |             |           |               |          |                 |
| $\sigma^2$                                           | 2.11        | 1.45      |               |          |                 |
| Random intercept                                     | 1.12        | 1.06      |               |          |                 |
| ICC                                                  | 0.35        |           |               |          |                 |
| Marginal R <sup>2</sup> / conditional R <sup>2</sup> | 0.14 / 0.44 |           |               |          |                 |
| <i>Motivation</i>                                    |             |           |               |          |                 |
| Predictors                                           | <i>b</i>    | <i>SE</i> | 95% CI        | <i>t</i> | <i>p</i>        |
| Intercept                                            | 3.55        | 0.15      | 3.25 – 3.85   | 23.40    | <b>&lt;.001</b> |
| task version                                         | -0.21       | 0.07      | -0.36 - -0.07 | -2.92    | <b>.004</b>     |
| age                                                  | -0.16       | 0.15      | -0.46 – 0.14  | -1.04    | .301            |
| sex                                                  | 0.07        | 0.14      | -0.20 – 0.35  | 0.52     | .607            |
| age * task version                                   | -0.07       | 0.07      | -0.22 – 0.08  | -0.97    | .335            |
| sex * task version                                   | 0.06        | 0.07      | -0.07 – 0.20  | 0.91     | .368            |
| age * sex                                            | -0.02       | 0.15      | -0.31 – 0.27  | -0.14    | .886            |
| age * sex * task version                             | 0.00        | 0.07      | -0.14 – 0.15  | 0.06     | .953            |
| Random effects                                       |             |           |               |          |                 |
| $\sigma^2$                                           | 1.06        | 1.03      |               |          |                 |
| Random intercept                                     | 1.70        | 1.30      |               |          |                 |
| ICC                                                  | 0.62        |           |               |          |                 |

|                                                                                                                                              |             |           |               |          |          |
|----------------------------------------------------------------------------------------------------------------------------------------------|-------------|-----------|---------------|----------|----------|
| Marginal R <sup>2</sup> / conditional R <sup>2</sup>                                                                                         | 0.03 / 0.63 |           |               |          |          |
| Performance (total score original version and weighted 15-item score short version)                                                          |             |           |               |          |          |
| Predictors                                                                                                                                   | <i>b</i>    | <i>SE</i> | 95% CI        | <i>t</i> | <i>p</i> |
| Intercept                                                                                                                                    | 69.97       | 0.73      | 68.53 – 71.41 | 95.79    | <.001    |
| task version                                                                                                                                 | -1.98       | 0.51      | -2.98 – -0.97 | -3.89    | <.001    |
| age                                                                                                                                          | -0.87       | 0.74      | -2.32 – 0.59  | -1.17    | .245     |
| sex                                                                                                                                          | 0.65        | 0.68      | -0.68 – 1.99  | 0.97     | .337     |
| age * task version                                                                                                                           | -0.18       | 0.52      | -1.21 – 0.84  | -0.36    | .723     |
| sex * task version                                                                                                                           | 0.51        | 0.47      | -0.42 – 1.44  | 1.07     | .285     |
| age * sex                                                                                                                                    | 0.46        | 0.46      | -0.94 – 1.85  | 0.64     | .521     |
| age * sex * task version                                                                                                                     | 0.41        | 0.50      | -0.57 – 1.39  | 0.83     | .412     |
| Random effects                                                                                                                               |             |           |               |          |          |
| σ <sup>2</sup>                                                                                                                               | 50.66       | 7.12      |               |          |          |
| Random intercept                                                                                                                             | 26.28       | 5.13      |               |          |          |
| ICC                                                                                                                                          | 0.34        |           |               |          |          |
| Marginal R <sup>2</sup> / conditional R <sup>2</sup>                                                                                         | 0.08 / 0.39 |           |               |          |          |
| Performance (total score original version and weighted 15-item score short version): now also including fatigue and motivation as predictors |             |           |               |          |          |
| Predictors                                                                                                                                   | <i>b</i>    | <i>SE</i> | 95% CI        | <i>t</i> | <i>p</i> |
| intercept                                                                                                                                    | 69.80       | 0.75      | 68.32 – 71.28 | 93.06    | <.001    |
| task version                                                                                                                                 | -2.24       | 0.56      | -3.34 – -1.14 | -4.00    | <.001    |
| fatigue                                                                                                                                      | 0.92        | 0.69      | -0.45 – 2.29  | 1.32     | .187     |
| motivation                                                                                                                                   | -0.45       | 0.72      | -1.87 – 0.97  | -0.62    | .537     |
| age                                                                                                                                          | -1.17       | 0.75      | -2.65 – 0.30  | -1.57    | .119     |
| sex                                                                                                                                          | 0.69        | 0.68      | -0.65 – 2.03  | 1.02     | .311     |
| fatigue * task version                                                                                                                       | 0.77        | 0.63      | -0.46 – 2.01  | 1.23     | .219     |
| motivation * task version                                                                                                                    | -0.49       | 0.61      | -1.70 – 0.72  | -0.80    | .423     |
| fatigue * motivation                                                                                                                         | 0.45        | 0.65      | -0.84 – 1.74  | 0.69     | .494     |
| age * task version                                                                                                                           | -0.50       | 0.55      | -1.58 – 0.58  | -0.91    | .366     |
| sex * task version                                                                                                                           | 0.56        | 0.49      | -0.40 – 1.53  | 1.15     | .483     |
| age * sex                                                                                                                                    | 0.50        | 0.70      | -0.89 – 1.88  | 0.71     | .255     |
| fatigue * motivation * task version                                                                                                          | 0.27        | 0.58      | -0.87 – 1.41  | 0.47     | .640     |
| age * sex * task version                                                                                                                     | 0.46        | 0.50      | -0.54 – 1.45  | 0.90     | .370     |
| Random effects                                                                                                                               |             |           |               |          |          |
| σ <sup>2</sup>                                                                                                                               | 52.34       | 7.24      |               |          |          |
| Random intercept                                                                                                                             | 24.34       | 4.93      |               |          |          |
| ICC                                                                                                                                          | 0.32        |           |               |          |          |
| Marginal R <sup>2</sup> / conditional R <sup>2</sup>                                                                                         | 0.10 / 0.38 |           |               |          |          |

**Table S3**

*Means and standard deviations (between brackets) for the different percentage correct scores on the original and short versions.*

| Based on                                     | Percentage correct |
|----------------------------------------------|--------------------|
| 1. Total score (original version)            | 67.92 (11.86)      |
| 2. Weighted 15-item score (original version) | 71.82 (4.37)       |
| 3. Weighted 15-item score (short version)    | 71.84 (3.94)       |

**Table S4**

*Correlations between the various performance measures.*

|                                              | 1   | 2   | 3 |
|----------------------------------------------|-----|-----|---|
| 1. Total score (original version)            | -   |     |   |
| 2. Weighted 15-item score (original version) | .84 | -   |   |
| 3. Weighted 15-item score (short version)    | .62 | .62 | - |

*Note: all  $p$ 's < .001.*

**Table S5**

*Results from linear mixed models on performance (now using the weighted 15-item measure for the original version).*

| <i>Performance (weighted 15-item score original version and weighted 15-item score short version)</i> |             |           |               |          |          |
|-------------------------------------------------------------------------------------------------------|-------------|-----------|---------------|----------|----------|
| Predictors                                                                                            | <i>b</i>    | <i>SE</i> | 95% CI        | <i>t</i> | <i>p</i> |
| Intercept                                                                                             | 71.89       | 0.36      | 71.17 – 72.61 | 197.08   | <.001    |
| task version                                                                                          | -0.08       | 0.18      | -0.43 – 0.27  | -0.43    | .668     |
| age                                                                                                   | -0.44       | 0.37      | -1.17 – 0.29  | -1.19    | .237     |
| sex                                                                                                   | 0.02        | 0.34      | -0.65 – 0.68  | 0.05     | .959     |
| age * task version                                                                                    | 0.24        | 0.18      | -0.11 – 0.60  | 1.34     | .182     |
| sex * task version                                                                                    | -0.15       | 0.16      | -0.47 – 0.18  | -0.89    | .374     |
| age * sex                                                                                             | 0.16        | 0.35      | -0.54 – 0.85  | 0.44     | .658     |
| age * sex * task version                                                                              | 0.11        | 0.11      | -0.23 – 0.45  | 0.64     | .525     |
| Random effects                                                                                        |             |           |               |          |          |
| $\sigma^2$                                                                                            | 6.13        | 2.48      |               |          |          |
| Random intercept                                                                                      | 9.77        | 3.13      |               |          |          |
| ICC                                                                                                   | 0.61        |           |               |          |          |
| Marginal $R^2$ / conditional $R^2$                                                                    | 0.02 / 0.62 |           |               |          |          |

| <i>Performance (weighted 15-item score original version and weighted 15-item score short version):<br/>now also including fatigue and motivation as predictors</i> |             |           |               |          |                 |
|--------------------------------------------------------------------------------------------------------------------------------------------------------------------|-------------|-----------|---------------|----------|-----------------|
| Predictors                                                                                                                                                         | <i>b</i>    | <i>SE</i> | 95% CI        | <i>t</i> | <i>p</i>        |
| intercept                                                                                                                                                          | 71.93       | 0.37      | 71.20 – 72.67 | 192.83   | <b>&lt;.001</b> |
| task version                                                                                                                                                       | -0.09       | 0.20      | -0.49 – 0.30  | -0.47    | .640            |
| fatigue                                                                                                                                                            | 0.12        | 0.28      | -0.44 – 0.68  | 0.43     | .668            |
| motivation                                                                                                                                                         | -0.11       | 0.31      | -0.72 – 0.51  | -0.34    | .736            |
| age                                                                                                                                                                | -0.47       | 0.37      | -1.20 – 0.27  | -1.25    | .214            |
| sex                                                                                                                                                                | 0.03        | 0.34      | -0.65 – 0.70  | 0.07     | .943            |
| fatigue * task version                                                                                                                                             | -0.20       | 0.23      | -0.66 – 0.26  | -0.87    | .383            |
| motivation * task version                                                                                                                                          | -0.18       | 0.23      | -0.63 – 0.26  | -0.81    | .418            |
| fatigue * motivation                                                                                                                                               | 0.07        | 0.27      | -0.47 – 0.60  | 0.25     | .806            |
| age * task version                                                                                                                                                 | 0.23        | 0.19      | -0.15 – 0.61  | 1.18     | .243            |
| sex * task version                                                                                                                                                 | 0.16        | 0.17      | -0.50 – 0.18  | -0.95    | .676            |
| age * sex                                                                                                                                                          | -0.15       | 0.35      | -0.55 – 0.84  | 0.42     | .346            |
| fatigue * motivation * task<br>version                                                                                                                             | 0.14        | 0.21      | -0.28 – 0.56  | 0.68     | .501            |
| age * sex * task version                                                                                                                                           | 0.12        | 0.18      | -0.23 – 0.47  | 0.67     | .503            |
| Random effects                                                                                                                                                     |             |           |               |          |                 |
| $\sigma^2$                                                                                                                                                         | 6.39        | 2.53      |               |          |                 |
| Random intercept                                                                                                                                                   | 9.66        | 3.12      |               |          |                 |
| ICC                                                                                                                                                                | 0.60        |           |               |          |                 |
| Marginal R <sup>2</sup> / conditional R <sup>2</sup>                                                                                                               | 0.03 / 0.61 |           |               |          |                 |

## Figure S2

Percentage correct for how often each item was answered correctly in the original version.

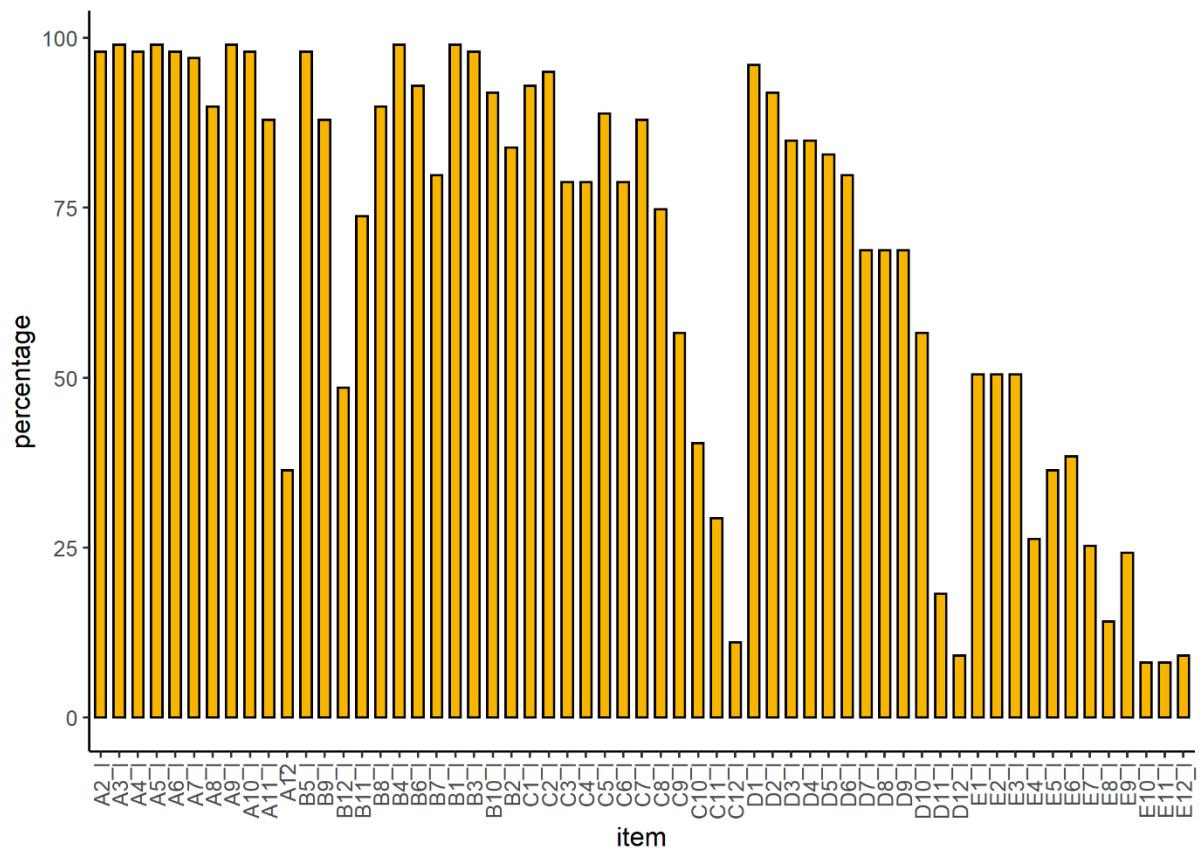

## Results exploratory logistic regression models

For the mixed effects logistic regression models, the assumption of linearity was met as there were no continuous predictors and as there is only one dichotomous predictor (i.e. version). Note that we introduced a random intercept of version, therefore accounting for potential dependency in the data due to the fact that each participant completed both versions (see Table S6 for all results). To account for multiple testing, we only considered Bonferroni corrected p-values significant when they were smaller than  $0.05 / 16 = 0.003$ .

**Table S6**

*Results from a series of linear mixed logistic regressions testing the effect of version on performance per item.*

| <i>Item A6</i>                                       |             |           |           |                  |          |                 |
|------------------------------------------------------|-------------|-----------|-----------|------------------|----------|-----------------|
| Predictor                                            | <i>b</i>    | <i>SE</i> | <i>OR</i> | <i>OR 95% CI</i> | <i>z</i> | <i>p</i>        |
| intercept                                            | 11.16       | 1.95      | NA        | NA               | 3.79     | <b>&lt;.001</b> |
| task version                                         | 0.00        | 1.11      | 1.00      | 0.11 – 8.85      | 0.00     | .999            |
| Other                                                |             |           |           |                  |          |                 |
| ICC                                                  | 0.98        |           |           |                  |          |                 |
| Marginal R <sup>2</sup> / conditional R <sup>2</sup> | 0.00 / 0.98 |           |           |                  |          |                 |
| <i>Item B10</i>                                      |             |           |           |                  |          |                 |
| Predictor                                            | <i>b</i>    | <i>SE</i> | <i>OR</i> | <i>OR 95% CI</i> | <i>z</i> | <i>p</i>        |
| intercept                                            | 2.58        | 0.28      | NA        | NA               | 9.22     | <b>&lt;.001</b> |
| task version                                         | -0.15       | 0.28      | 0.86      | 0.49 – 1.49      | -0.53    | .594            |
| Other                                                |             |           |           |                  |          |                 |
| ICC                                                  | NE          |           |           |                  |          |                 |
| Marginal R <sup>2</sup> / conditional R <sup>2</sup> | NE          |           |           |                  |          |                 |
| <i>Item B12</i>                                      |             |           |           |                  |          |                 |
| Predictor                                            | <i>b</i>    | <i>SE</i> | <i>OR</i> | <i>OR 95% CI</i> | <i>z</i> | <i>p</i>        |
| intercept                                            | 0.07        | 0.20      | NA        | NA               | 0.32     | .746            |
| task version                                         | -0.15       | 0.16      | 0.86      | 0.63 – 1.19      | -0.89    | .372            |
| Other                                                |             |           |           |                  |          |                 |
| ICC                                                  | 0.30        |           |           |                  |          |                 |
| Marginal R <sup>2</sup> / conditional R <sup>2</sup> | 0.01 / 0.30 |           |           |                  |          |                 |
| <i>Item C11</i>                                      |             |           |           |                  |          |                 |
| Predictor                                            | <i>b</i>    | <i>SE</i> | <i>OR</i> | <i>OR 95% CI</i> | <i>z</i> | <i>p</i>        |
| intercept                                            | -1.47       | 0.44      | NA        | NA               | -2.28    | <b>&lt;.001</b> |
| task version                                         | -0.13       | 0.20      | 0.88      | 0.59 – 1.31      | -0.65    | .518            |
| Other                                                |             |           |           |                  |          |                 |
| ICC                                                  | 0.59        |           |           |                  |          |                 |
| Marginal R <sup>2</sup> / conditional R <sup>2</sup> | 0.00 / 0.59 |           |           |                  |          |                 |
| <i>Item D1</i>                                       |             |           |           |                  |          |                 |
| Predictor                                            | <i>b</i>    | <i>SE</i> | <i>OR</i> | <i>OR 95% CI</i> | <i>z</i> | <i>p</i>        |
| intercept                                            | 23.06       | 4.71      | NA        | NA               | 4.90     | <b>&lt;.001</b> |
| task version                                         | -8.15       | 3.59      | 0.00      | 0.00 – 0.33      | -2.27    | .023            |
| Other                                                |             |           |           |                  |          |                 |



|                                                      |             |           |           |                  |          |                 |
|------------------------------------------------------|-------------|-----------|-----------|------------------|----------|-----------------|
| ICC                                                  | 1.00        |           |           |                  |          |                 |
| Marginal R <sup>2</sup> / conditional R <sup>2</sup> | 0.01 / 0.99 |           |           |                  |          |                 |
| <i>Item D2</i>                                       |             |           |           |                  |          |                 |
| Predictor                                            | <i>b</i>    | <i>SE</i> | <i>OR</i> | <i>OR 95% CI</i> | <i>z</i> | <i>p</i>        |
| intercept                                            | 8.69        | 1.75      | NA        | NA               | 4.95     | <b>&lt;.001</b> |
| task version                                         | -1.12       | 0.65      | 0.33      | 0.09 – 1.17      | -1.72    | .086            |
| Other                                                |             |           |           |                  |          |                 |
| ICC                                                  | 0.95        |           |           |                  |          |                 |
| Marginal R <sup>2</sup> / conditional R <sup>2</sup> | 0.02 / 0.95 |           |           |                  |          |                 |
| <i>Item D4</i>                                       |             |           |           |                  |          |                 |
| Predictor                                            | <i>b</i>    | <i>SE</i> | <i>OR</i> | <i>OR 95% CI</i> | <i>z</i> | <i>p</i>        |
| intercept                                            | 7.44        | 1.47      | NA        | NA               | 5.08     | <b>&lt;.001</b> |
| task version                                         | -0.89       | 0.46      | 0.41      | 0.17 – 1.02      | -1.92    | .055            |
| Other                                                |             |           |           |                  |          |                 |
| ICC                                                  | 0.94        |           |           |                  |          |                 |
| Marginal R <sup>2</sup> / conditional R <sup>2</sup> | 0.01 / 0.94 |           |           |                  |          |                 |
| <i>Item D6</i>                                       |             |           |           |                  |          |                 |
| Predictor                                            | <i>b</i>    | <i>SE</i> | <i>OR</i> | <i>OR 95% CI</i> | <i>z</i> | <i>p</i>        |
| intercept                                            | 1.81        | 0.36      | NA        | NA               | 5.04     | <b>&lt;.001</b> |
| task version                                         | -0.19       | 0.20      | 0.83      | 0.56 – 1.22      | -0.94    | .346            |
| Other                                                |             |           |           |                  |          |                 |
| ICC                                                  | 0.20        |           |           |                  |          |                 |
| Marginal R <sup>2</sup> / conditional R <sup>2</sup> | 0.01 / 0.21 |           |           |                  |          |                 |
| <i>Item D9</i>                                       |             |           |           |                  |          |                 |
| Predictor                                            | <i>b</i>    | <i>SE</i> | <i>OR</i> | <i>OR 95% CI</i> | <i>z</i> | <i>p</i>        |
| intercept                                            | 1.09        | 0.26      | NA        | NA               | 4.16     | <b>&lt;.001</b> |
| task version                                         | -0.08       | 0.17      | 0.92      | 0.65 – 1.29      | -0.48    | .634            |
| Other                                                |             |           |           |                  |          |                 |
| ICC                                                  | 0.27        |           |           |                  |          |                 |
| Marginal R <sup>2</sup> / conditional R <sup>2</sup> | 0.00 / 0.27 |           |           |                  |          |                 |
| <i>Item D10</i>                                      |             |           |           |                  |          |                 |
| Predictor                                            | <i>b</i>    | <i>SE</i> | <i>OR</i> | <i>OR 95% CI</i> | <i>z</i> | <i>p</i>        |
| intercept                                            | 0.14        | 0.17      | NA        | NA               | 0.81     | .416            |
| task version                                         | 0.15        | 0.15      | 1.16      | 0.86 – 1.57      | 0.00     | .323            |
| Other                                                |             |           |           |                  |          |                 |
| ICC                                                  | 0.14        |           |           |                  |          |                 |
| Marginal R <sup>2</sup> / conditional R <sup>2</sup> | 0.01 / 0.15 |           |           |                  |          |                 |
| <i>Item E2</i>                                       |             |           |           |                  |          |                 |
| Predictor                                            | <i>b</i>    | <i>SE</i> | <i>OR</i> | <i>OR 95% CI</i> | <i>z</i> | <i>p</i>        |
| intercept                                            | -0.10       | 0.22      | NA        | NA               | -0.45    | .655            |
| task version                                         | 0.13        | 0.17      | 1.14      | 0.82 – 1.59      | 0.76     | .446            |
| Other                                                |             |           |           |                  |          |                 |
| ICC                                                  | 0.38        |           |           |                  |          |                 |
| Marginal R <sup>2</sup> / conditional R <sup>2</sup> | 0.00 / 0.38 |           |           |                  |          |                 |

| <i>Item E3</i>                                       |             |           |           |                  |          |                 |
|------------------------------------------------------|-------------|-----------|-----------|------------------|----------|-----------------|
| Predictor                                            | <i>b</i>    | <i>SE</i> | <i>OR</i> | <i>OR 95% CI</i> | <i>z</i> | <i>p</i>        |
| intercept                                            | 0.21        | 0.25      | NA        | NA               | 0.82     | .412            |
| task version                                         | -0.19       | 0.32      | 0.83      | 0.44 – 1.56      | -0.58    | .561            |
| Other                                                |             |           |           |                  |          |                 |
| ICC                                                  | 0.25        |           |           |                  |          |                 |
| Marginal R <sup>2</sup> / conditional R <sup>2</sup> | 0.00 / 0.25 |           |           |                  |          |                 |
| <i>Item E4</i>                                       |             |           |           |                  |          |                 |
| Predictor                                            | <i>b</i>    | <i>SE</i> | <i>OR</i> | <i>OR 95% CI</i> | <i>z</i> | <i>p</i>        |
| intercept                                            | -1.86       | 0.46      | NA        | NA               | -4.03    | <b>&lt;.001</b> |
| task version                                         | 0.23        | 0.21      | 1.26      | 0.84 – 1.88      | 1.10     | .270            |
| Other                                                |             |           |           |                  |          |                 |
| ICC                                                  | 0.48        |           |           |                  |          |                 |
| Marginal R <sup>2</sup> / conditional R <sup>2</sup> | 0.01 / 0.49 |           |           |                  |          |                 |
| <i>Item E5</i>                                       |             |           |           |                  |          |                 |
| Predictor                                            | <i>b</i>    | <i>SE</i> | <i>OR</i> | <i>OR 95% CI</i> | <i>z</i> | <i>p</i>        |
| intercept                                            | -0.88       | 0.30      | NA        | NA               | -2.89    | <b>.004</b>     |
| task version                                         | -0.02       | 0.19      | 0.98      | 0.68 – 1.41      | -0.11    | .915            |
| Other                                                |             |           |           |                  |          |                 |
| ICC                                                  | 0.49        |           |           |                  |          |                 |
| Marginal R <sup>2</sup> / conditional R <sup>2</sup> | 0.00 / 0.49 |           |           |                  |          |                 |
| <i>Item E6</i>                                       |             |           |           |                  |          |                 |
| Predictor                                            | <i>b</i>    | <i>SE</i> | <i>OR</i> | <i>OR 95% CI</i> | <i>z</i> | <i>p</i>        |
| intercept                                            | -0.75       | 0.23      | NA        | NA               | -3.21    | <b>.001</b>     |
| task version                                         | 0.13        | 0.17      | 1.14      | 0.82 – 1.59      | 0.76     | .447            |
| Other                                                |             |           |           |                  |          |                 |
| ICC                                                  | 0.30        |           |           |                  |          |                 |
| Marginal R <sup>2</sup> / conditional R <sup>2</sup> | 0.00 / 0.30 |           |           |                  |          |                 |

**Table S7**

*Results from linear model testing whether fatigue and motivation differences predict performance differences.*

| <i>Performance difference</i>            |                |           |               |          |                 |
|------------------------------------------|----------------|-----------|---------------|----------|-----------------|
| Predictors                               | <i>b</i>       | <i>SE</i> | 95% CI        | <i>t</i> | <i>p</i>        |
| Intercept                                | -4.09          | 1.03      | -6.14 – -2.05 | -3.97    | <b>&lt;.001</b> |
| fatigue difference                       | -0.28          | 1.08      | -2.43 – 1.86  | -0.26    | .793            |
| motivation difference                    | -0.51          | 1.08      | -2.67 – 1.64  | -0.47    | .638            |
| Other                                    |                |           |               |          |                 |
| R <sup>2</sup> / adjusted R <sup>2</sup> | 0.003 / -0.018 |           |               |          |                 |
| Degrees of freedom                       | 96             |           |               |          |                 |

## References

- (Pfadt et al. 2022) Pfadt, Julius M., Bergh, Don Van Den, Sijtsma, Klaas, and Eric-Jan Wagenmakers. 2022. A tutorial on Bayesian single-test reliability analysis with JASP. *Behavior Research Methods* 1–10. <https://doi.org/10.3758/s13428-021-01778-0>.
- (Schielzeth et al. 2020) Schielzeth, Holger, Niels J. Dingemanse, Shinichi Nakagawa, David F. Westneat, Hassen Allegue, Céline Teplitsky, Denis Réale, Ned A. Dochtermann, László Zsolt Garamszegi, and Yimen G. Araya-Ajoy. 2020. Robustness of linear mixed-effects models to violations of distributional assumptions. *Methods in Ecology and Evolution* 11: 1141–52. <https://doi.org/10.1111/2041-210x.13434>.
